# Supplementary material
Source: ML conference proceedings conference paper supplement (https://proceedings.mlr.press/v51/ghashami16.html)
Supplement: Supplementary file 1 [file ghashami16-supp.pdf]

# APPENDIX

## A High Probability Bound for RFFMaps

Here we extend the analysis of Lopez *et al.* [19] to show that the Fourier Random Features of Rahimi and Recht [22] approximate the spectral error with their approximate Gram matrix within  $\varepsilon n$  with high probability.

### A.1 High Probability Bound “for all” Bound for RFFMaps

In our proof we use the Bernstein inequality on sum of zero-mean random matrices.

**Matrix Bernstein Inequality:** Let  $X_1, \dots, X_d \in \mathbb{R}^{n \times n}$  be independent random matrices such that for all  $1 \leq i \leq d$ ,  $\mathbf{E}[X_i] = 0$  and  $\|X_i\|_2 \leq R$  for a fixed constant  $R$ . Define variance parameter as  $\sigma^2 = \max\{\|\sum_{i=1}^d \mathbf{E}[X_i^T X_i]\|, \|\sum_{i=1}^d \mathbf{E}[X_i X_i^T]\|\}$ . Then for all  $t \geq 0$ ,  $\Pr\left[\left\|\sum_{i=1}^d X_i\right\|_2 \geq t\right] \leq 2n \cdot \exp\left(\frac{-t^2}{3\sigma^2 + 2Rt}\right)$ .

Using this inequality, [19] bounded  $\mathbf{E}[\|G - \hat{G}\|_2]$ . Here we employ similar ideas to improve this to a bound on  $\|G - \hat{G}\|_2$  with high probability.

**Lemma A.1.** *For  $n$  points, let  $G = \Phi\Phi^T \in \mathbb{R}^{n \times n}$  be the exact gram matrix, and let  $\hat{G} = ZZ^T \in \mathbb{R}^{n \times n}$  be the approximate kernel matrix using  $m = O((1/\varepsilon^2) \log(n/\delta))$  RFFMAPS. Then  $\|G - \hat{G}\| \leq \varepsilon n$  with probability at least  $1 - \delta$ .*

*Proof.* Consider  $m$  independent random variables  $E_i = \frac{1}{m}G - z_i z_i^T$ . Note that  $\mathbf{E}[E_i] = \frac{1}{m}G - \mathbf{E}[z_i z_i^T] = 0^{n \times n}$  [22]. Next we can rewrite

$$\|E_i\|_2 = \left\| \frac{1}{m}G - z_i z_i^T \right\|_2 = \left\| \frac{1}{m}\mathbf{E}[ZZ^T] - z_i z_i^T \right\|_2$$

and thus bound

$$\begin{aligned} \|E_i\|_2 &\leq \frac{1}{m} \|\mathbf{E}[ZZ^T]\|_2 + \|z_i z_i^T\|_2 \leq \frac{1}{m} \mathbf{E}[\|Z\|_2^2] + \|z_i\|^2 \\ &\leq \frac{2n}{m} + \frac{2n}{m} = \frac{4n}{m} \end{aligned}$$

The first inequality is correct because of triangle inequality, and second inequality is achieved using Jensen’s inequality on expected values, which states  $\|\mathbf{E}[X]\| \leq \mathbf{E}[\|X\|]$  for any random variable  $X$ . Last inequality uses the bound on the norm of  $z_i$  as  $\|z_i\|^2 \leq \frac{2n}{m}$ , and therefore  $\|Z\|_2^2 \leq \|Z\|_F^2 \leq 2n$ .

To bound  $\sigma^2$ , due to symmetry of matrices  $E_i$ , simply

$\sigma^2 = \|\sum_{i=1}^m \mathbf{E}[E_i^2]\|_2$ . Expanding

$$\begin{aligned} \mathbf{E}[E_i^2] &= \mathbf{E}\left[\left(\frac{1}{m}G - z_i z_i^T\right)^2\right] \\ &= \mathbf{E}\left[\frac{G^2}{m^2} + \|z_i\|^2 z_i z_i^T - \frac{1}{m}(z_i z_i^T G + G z_i z_i^T)\right] \end{aligned}$$

it follows that

$$\begin{aligned} \mathbf{E}[E_i^2] &\leq \frac{G^2}{m^2} + \frac{2n}{m} \mathbf{E}[z_i z_i^T] - \frac{1}{m}(\mathbf{E}[z_i z_i^T]G + G \mathbf{E}[z_i z_i^T]) \\ &= \frac{1}{m^2}(G^2 + 2nG - 2G^2) = \frac{1}{m^2}(2nG - G^2) \end{aligned}$$

The first inequality holds by  $\|z_i\|^2 \leq 2n/m$ , and second inequality is due to  $\mathbf{E}[z_i z_i^T] = \frac{1}{m}G$ . Therefore

$$\begin{aligned} \sigma^2 &= \left\| \sum_{i=1}^m \mathbf{E}[E_i^2] \right\|_2 \leq \left\| \frac{1}{m}(2nG - G^2) \right\|_2 \\ &\leq \frac{2n}{m} \|G\|_2 + \frac{1}{m} \|G^2\|_2 \leq \frac{2n^2}{m} + \frac{1}{m} \|G\|_2^2 \leq \frac{3n^2}{m} \end{aligned}$$

the second inequality is by triangle inequality, and the last inequality by  $\|G\|_2 \leq \text{Tr}(G) = n$ . Setting  $M = \sum_{i=1}^m E_i = \sum_{i=1}^m (\frac{1}{m}G - z_i z_i^T) = G - \hat{G}$  and using Bernstein inequality with  $t = \varepsilon n$  we obtain

$$\begin{aligned} \Pr\left[\|G - \hat{G}\|_2 \geq \varepsilon n\right] &\leq 2n \exp\left(\frac{-(\varepsilon n)^2}{3\left(\frac{3n^2}{m}\right) + 2\left(\frac{4n}{m}\right)\varepsilon n}\right) \\ &= 2n \exp\left(\frac{-\varepsilon^2 m}{9 + 8\varepsilon}\right) \leq \delta \end{aligned}$$

Solving for  $m$  we get  $m \geq \frac{9+8\varepsilon}{\varepsilon^2} \log(2n/\delta)$ , so with probability at least  $1 - \delta$  for  $m = O(\frac{1}{\varepsilon^2} \log(n/\delta))$ , then  $\|G - \hat{G}\|_2 \leq \varepsilon n$ .  $\square$

### A.2 For Each Bound for RFFMaps

Here we bound  $|\|\Phi^T x\|^2 - \|Z^T x\|^2|$ , where  $\Phi$  and  $Z$  are mappings of data to RKHS by RFFMAPS, respectively and  $x$  is a fixed unit vector in  $\mathbb{R}^n$ .

Note that Lemma A.1 essentially already gave a stronger proof, where using  $m = O((1/\varepsilon^2) \log(n/\delta))$  the bound  $\|G - \hat{G}\|_2 \leq \varepsilon n$  holds along all directions (which makes progress towards addressing an open question of constructing oblivious subspace embeddings for Gaussian kernel features spaces, in [1]). The advantage of this proof is that the bound on  $m$  will be independent of  $n$ . Unfortunately, in this proof, going from the “for each” bound to the stronger “for all” bound would seem to require a net of size  $2^{O(n)}$  and a union bound resulting in a worse “for all” bound with  $m = O(n/\varepsilon^2)$ .

On the other hand, main objective of TEST TIME procedure, which is mapping a single data point to the

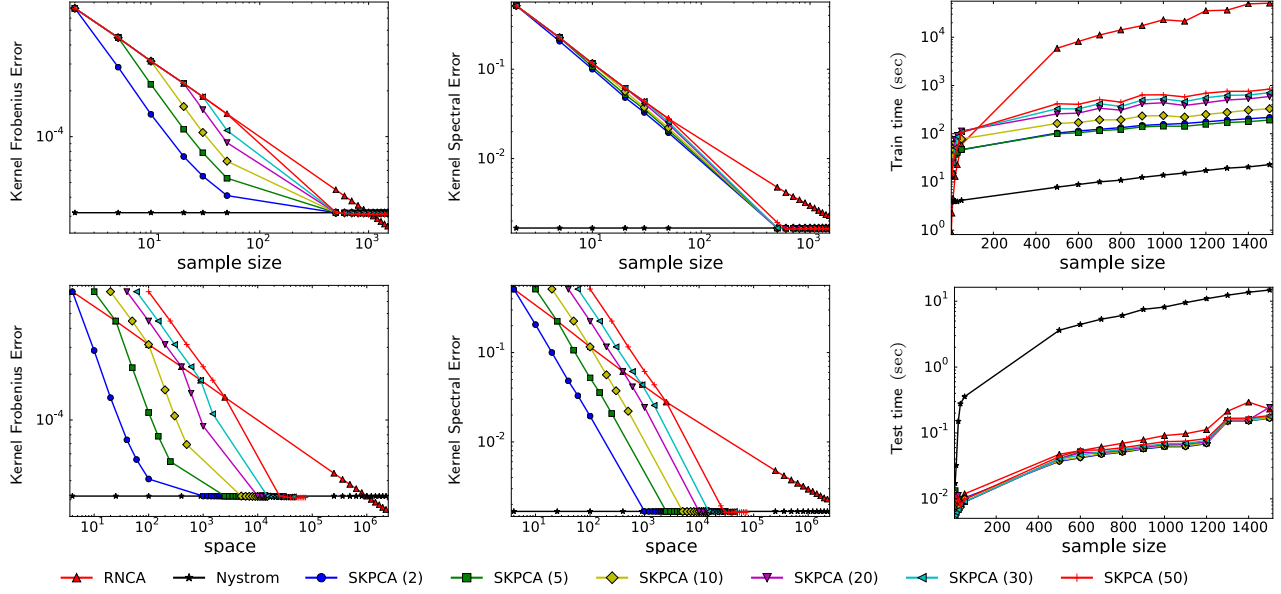

Figure 4: Results for FOREST dataset. Row 1: Kernel Frobenius Error (left), Kernel Spectral Error (middle) and TRAIN TIME (right) vs. SAMPLE SIZE. Row 2: Kernel Frobenius Error (left), Kernel Spectral Error (middle) vs. SPACE, and TEST TIME vs. SAMPLE SIZE (right)

$D$ -dimensional or  $k$ -dimensional kernel space is already interesting for what the error is expected to be for a single vector  $x$ . This scenario corresponds to the “for each” setting that we will prove in this section.

In our proof, we use a variant of Chernoff-Hoeffding inequality, stated next. Consider a set of  $r$  independent random variables  $\{X_1, \dots, X_r\}$  where  $0 \leq X_i \leq \Delta$ . Let  $M = \sum_{i=1}^r X_i$ , then for any  $\alpha \in (0, 1/2)$ ,  $\Pr[|M - \mathbf{E}[M]| > \alpha] \leq 2 \exp\left(\frac{-2\alpha^2}{r\Delta^2}\right)$ .

For this proof we are more careful with notation about rows and column vectors. Now matrix  $Z \in \mathbb{R}^{n \times m}$  can be written as a set rows  $[z_{1,:}, z_{2,:}, \dots, z_{n,:}]$  where each  $z_{i,:}$  is a vector of length  $m$  or a set of columns  $[z_{:,1}, z_{:,2}, \dots, z_{:,d}]$ , where each  $z_{:,j}$  is a vector of length  $n$ . We denote the  $(i, j)$ -th entry of this matrix as  $z_{i,j}$ .

**Theorem A.1.** For  $n$  points in any arbitrary dimension and a shift-invariant kernel, let  $G = \Phi\Phi^T \in \mathbb{R}^{n \times n}$  be the exact gram matrix, and  $\hat{G} = ZZ^T \in \mathbb{R}^{n \times n}$  be the approximate kernel matrix using  $m = O((1/\varepsilon^2) \log(1/\delta))$  RFFMAPS. Then for any fixed unit vector  $x \in \mathbb{R}^n$ , it holds that  $|\|\Phi^T x\|^2 - \|Z^T x\|^2| \leq \varepsilon n$  with probability at least  $1 - \delta$ .

*Proof.* Note  $\mathbb{R}^n$  is not the dimension of data. Consider any unit vector  $x \in \mathbb{R}^n$ . Define  $m$  independent random variables  $\{X_i = \langle z_{:,i}, x \rangle^2\}_{i=1}^m$ . We can bound each  $X_i$  as  $0 \leq X_i \leq \|z_{:,i}\|^2 \leq 2n/m$  therefore  $\Delta = 2n/m$  for

all  $X_i$ s. Setting  $M = \sum_{i=1}^m X_i = \|Z^T x\|^2$ , we observe

$$\begin{aligned}
 \mathbf{E}[M] &= \sum_{i=1}^m \mathbf{E}[\langle z_{:,i}, x \rangle^2] = \sum_{i=1}^m \mathbf{E}\left[\left(\sum_{j=1}^n z_{ji} x_j\right)^2\right] \\
 &= \sum_{i=1}^m \mathbf{E}\left[\sum_{j=1}^n (z_{ji} x_j)^2 + 2 \sum_{j=1}^n \sum_{k>j}^n z_{ji} z_{ki} x_j x_k\right] \\
 &= \sum_{j=1}^n x_j^2 \mathbf{E}\left[\sum_{i=1}^m z_{ji}^2\right] + 2 \sum_{j=1}^n \sum_{k>j}^n x_j x_k \mathbf{E}\left[\sum_{i=1}^m z_{ji} z_{ki}\right] \\
 &= \sum_{j=1}^n x_j^2 \mathbf{E}[\langle z_{j,:}, z_{j,:} \rangle] + 2 \sum_{j=1}^n \sum_{k>j}^n x_j x_k \mathbf{E}[\langle z_{j,:}, z_{k,:} \rangle] \\
 &= \sum_{j=1}^n x_j^2 \langle \phi_{j,:}, \phi_{j,:} \rangle + 2 \sum_{j=1}^n \sum_{k>j}^n x_j x_k \langle \phi_{j,:}, \phi_{k,:} \rangle \\
 &= \sum_{j=1}^n x_j^2 \sum_{i=1}^D \phi_{ji}^2 + 2 \sum_{j=1}^n \sum_{k>j}^n x_j x_k \sum_{i=1}^D \phi_{ji} \phi_{ki} \\
 &= \sum_{i=1}^D \left( \sum_{j=1}^n x_j^2 \phi_{ji}^2 + 2 \sum_{j=1}^n \sum_{k>j}^n x_j x_k \phi_{ji} \phi_{ki} \right) \\
 &= \sum_{i=1}^D \langle \phi_{:,i}, x \rangle^2 = \|\Phi^T x\|^2
 \end{aligned}$$

Since  $x$  is a fixed unit vector, it is pulled out of all expectations. Using the Chernoff-Hoeffding bound and setting  $\alpha = \varepsilon n$  yields  $\Pr[|\|\Phi^T x\|^2 - \|Z^T x\|^2| > \varepsilon n] \leq 2 \exp\left(\frac{-2(\varepsilon n)^2}{m(2n/m)^2}\right) = 2 \exp(-2\varepsilon^2 m) \leq \delta$ . Then we solve for  $m = (1/(2\varepsilon^2)) \ln(2/\delta)$  in the last inequality.  $\square$
